# Supplementary material for: Sequential solvent fractionation of lignin for selective production of monoaromatics by Ru catalyzed ethanolysis
Source: Royal Society of Chemistry journal article supplement (doi:10.1039/c7ra11541e), 2017-01-01
Supplement: c7ra11541e1.pdf [file c7ra11541e1.pdf]

**RSC advances**

**Sequential solvent fractionation of lignin for selective production  
of monoaromatics by Ru catalyzed ethanolysis**

Jae-Young Kim<sup>a</sup>, Shin Young Park<sup>a</sup>, Jae Hoon Lee<sup>a</sup>, In-Gyu Choi<sup>a,b</sup>,

Joon Weon Choi<sup>c\*</sup>

<sup>a</sup> Department of Forest Sciences and Research Institute for Agriculture and Life Science, Seoul National University, 599 Gwanak-ro, Gwanak-gu, Seoul, 151-921, Republic of Korea

<sup>b</sup> Research Institute of Agriculture and Life Sciences, Seoul National University, Seoul 151-742, Republic of Korea

<sup>c</sup> Graduate School of International Agricultural Technology and Institute of Green-Bio Science and Technology, Seoul National University, Pyeongchang 232-916, Republic of Korea

\*Corresponding author. Tel: +82-33-339-5840; Fax: +82-33-339-5689

E-mail address: [cjw@snu.ac.kr](mailto:cjw@snu.ac.kr)

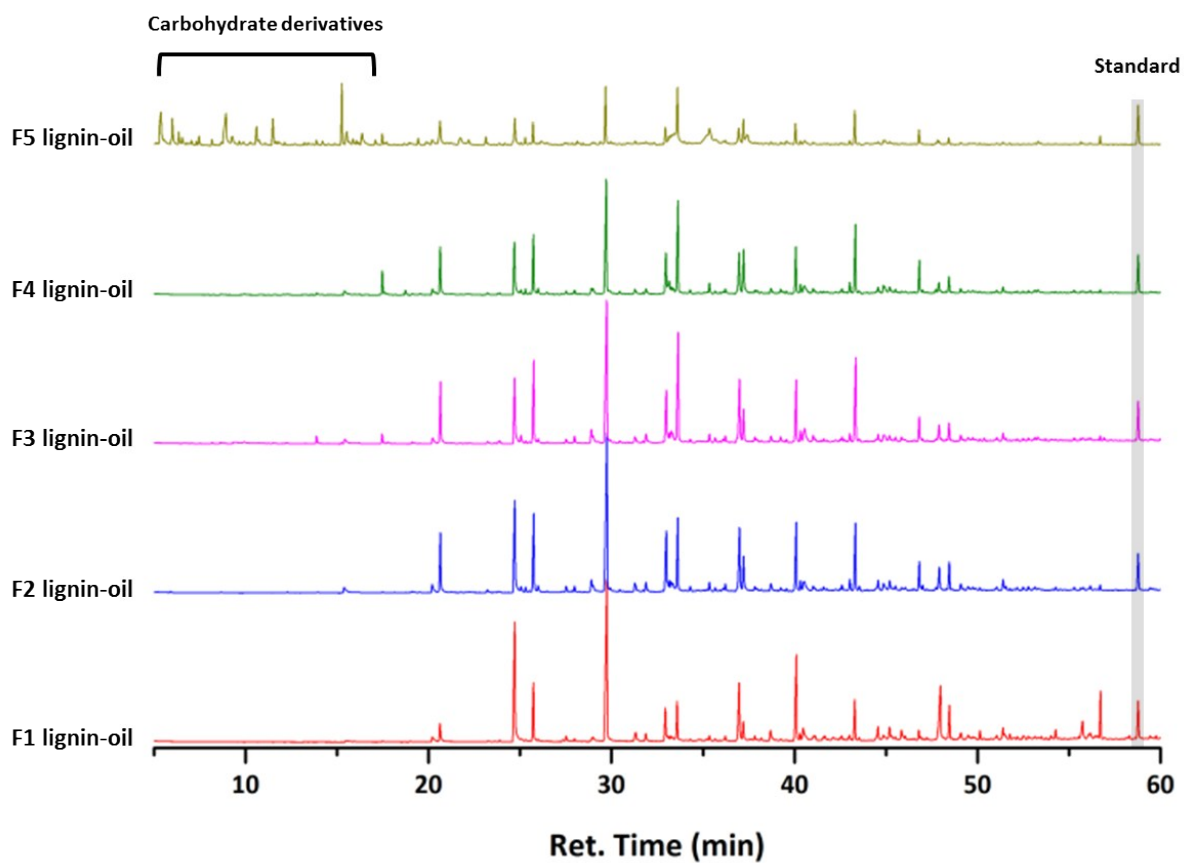

**Figure S1. GC-FID chromatogram of lignin-oil derived from different lignin fraction**

**Table S1. GC/MS detectable monoaromatic compounds in lignin-oils**

| Peak No. | Compounds                        | Type | Yield (mg/g of lignin) |       |       |      |      |      |
|----------|----------------------------------|------|------------------------|-------|-------|------|------|------|
|          |                                  |      | SL                     | F1    | F2    | F3   | F4   | F5   |
| 1        | <i>p</i> -cresol                 | C1C6 | 1.4                    | 1.2   | 1.4   | 1.0  | 0.9  | -    |
| 2        | Guaiacol                         | C6   | 5.9                    | 2.3   | 5.9   | 5.4  | 3.2  | 3.0  |
| 3        | 4-ethylphenol                    | C2C6 | 9.1                    | 15.2  | 9.6   | 6.1  | 4.5  | 3.2  |
| 4        | 3-methylguaiacol                 | C1C6 | 0.3                    | 0.4   | 0.6   | 0.7  | 0.3  | 0.7  |
| 5        | 4-methylguaiacol                 | C1C6 | 7.1                    | 6.1   | 7.6   | 7.7  | 4.3  | 2.0  |
| 6        | 2-ethyl-5-methylphenol           | C2C6 | 0.5                    | 0.3   | 0.6   | 0.6  | 0.3  | -    |
| 7        | 3-methoxycathecol                | C6   | 1.7                    | 1.6   | 3.1   | 1.7  | 1.5  | -    |
| 8        | 4-ethylguaiacol                  | C2C6 | 13.1                   | 17.6  | 15.3  | 12.5 | 8.2  | 4.0  |
| 9        | 4-vinylguaiacol                  | C2C6 | 0.9                    | 1.1   | 0.8   | 0.6  | 0.3  | -    |
| 10       | 4-ethyl-1,2-dimethoxybenzene     | C2C6 | 0.6                    | 0.6   | 0.8   | 0.7  | 0.3  | -    |
| 11       | Syringol                         | C6   | 8.4                    | 5.4   | 10.7  | 9.5  | 5.9  | 2.7  |
| 12       | 4-propylguaiacol                 | C3C6 | 5.5                    | 3.7   | 6.7   | 10.5 | 8.4  | 5.2  |
| 13       | 4-methylsyringol                 | C1C6 | 6.0                    | 6.5   | 7.1   | 7.2  | 4.1  | 2.0  |
| 14       | trans-isoeugenol                 | C3C6 | 6.4                    | 5.2   | 8.9   | 9.1  | 11.6 | 6.8  |
| 15       | Acetoguaiacone                   | OP   | 0.6                    | 0.8   | 0.5   | 0.4  | 0.3  | -    |
| 16       | 4-ethylsyringol                  | C2C6 | 5.7                    | 9.2   | 6.6   | 6.0  | 4.0  | 1.7  |
| 17       | Guaiacyl acetone                 | OP   | 0.5                    | 0.4   | 0.6   | 0.7  | 0.6  | -    |
| 18       | Homovanillyl alcohol             | OP   | 1.0                    | 1.3   | 1.0   | 1.6  | 1.0  | -    |
| 19       | Vanillic acid, ethyl ester       | OP   | 0.3                    | 0.3   | 0.3   | 0.3  | 0.2  | -    |
| 20       | 4-propylsyringol                 | C3C6 | 4.9                    | 3.4   | 6.4   | 8.4  | 6.4  | 2.7  |
| 21       | Ethyl homovanillate              | OP   | 0.6                    | 1.0   | 0.6   | 0.4  | 0.4  | -    |
| 22       | Acetosyringone                   | OP   | 6.2                    | 14.6  | 3.5   | 2.7  | 1.8  | -    |
| 23       | Dihydroferulic acid, ethyl ester | OP   | 1.5                    | 2.0   | 1.6   | 1.1  | 0.9  | 0.3  |
|          | Sum of C6P                       |      | 16.0                   | 9.2   | 19.8  | 16.6 | 10.5 | 5.7  |
|          | Sum of C1C6P                     |      | 14.9                   | 14.2  | 16.8  | 16.6 | 9.7  | 4.7  |
|          | Sum of C2C6P                     |      | 29.9                   | 44.2  | 33.7  | 26.5 | 17.7 | 8.9  |
|          | Sum of C3C6P                     |      | 16.8                   | 12.4  | 21.9  | 27.9 | 26.4 | 14.7 |
|          | Sum of OP                        |      | 10.6                   | 20.4  | 8.1   | 7.2  | 5.2  | 0.3  |
|          | Total                            |      | 88.3                   | 100.3 | 100.2 | 94.9 | 69.6 | 34.3 |
